# Supplementary material
Source: Research Square preprint supplement (doi:10.21203/rs.3.rs-8624946/v1)
Supplement: Supplementary file 1 [file 5490ba191b300a731a483fb7.xlsx]

## Sheet: Table S1
Table S1. Remuneration of specialist doctors and hospital nurses in relation to the national average wage
OECD Health at Glance 2025 (accessed December 15 2025)
Remuneration of specialists doctors, 2023 (or nearest year) - specialist doctors earning in relation to the average national wage
Notes: 1. 2020 data. 2. 2021 data. 3. 2022 data. 4. 2024 data. *Accession country.
Source: OECD Health Statistics 2025.
Country	Salaried	Self-employed	Year
Switzerland³		3.1	2022
Netherlands³		3.21	2022
Israel		3.76	2023
Canada³		4.35	2022
Austria²		4.6	2021
Germany		4.9	2023
Korea¹		6.83	2020
Bulgaria³*	1.83		2022
Norway	1.88		2023
Slovenia	1.93		2023
Lithuania³	2.01		2022
Portugal⁴	2.13		2024
Costa Rica¹	2.14		2020
Iceland²	2.2		2021
Latvia³	2.2		2022
Sweden	2.2		2023
France²	2.3		2021
Belgium	2.42		2023
Denmark	2.43		2023
Czechia	2.45		2023
Estonia⁴	2.48		2024
Greece	2.48		2023
New Zealand	2.52		2023
Finland	2.53		2023
Colombia	2.59		2023
Spain	2.6		2023
Croatia³*	2.69		2022
Italy⁴	2.79		2024
OECD31	2.79
Slovak Republic	2.89		2023
Türkiye	2.9		2023
Poland³	2.91		2022
Israel	2.98		2023
Mexico	3.13		2023
Germany	3.2		2023
Netherlands	3.31		2023
United Kingdom¹	3.34		2020
Chile³	4.17		2022
Ireland⁴	4.24		2024
Korea¹	4.4		2020
Hungary	4.81		2023
Remuneration of hospital nurses, 2023 (or nearest year) - hospital nurses earnings in relation to the average national wage
1. Includes “associate professional” nurses with lower qualifications and revenues. 2. Includes only hospital nurses working in the National Health Service (public sector). 3. 2021 data. 4. 2022 data. 5. 2024 data. *Accession country.
Source: OECD Health Statistics 2025.
Country	Year	Ratio
Switzerland¹	2023	0.85
United Kingdom	2023	0.88
Finland	2023	0.94
Italy	2024	0.94
Portugal²	2023	0.96
Türkiye	2023	0.96
France³	2021	0.97
Sweden	2023	1
Iceland³	2021	1.01
Norway	2023	1.01
Lithuania⁴	2022	1.03
Canada	2023	1.04
Japan⁴	2022	1.04
Denmark⁵	2024	1.04
New Zealand	2023	1.09
Estonia	2023	1.12
Croatia⁴*	2022	1.12
Ireland	2023	1.13
Germany⁴	2022	1.17
OECD33		1.17
Latvia⁴	2022	1.19
Netherlands	2023	1.19
United States	2023	1.21
Slovenia	2023	1.23
Bulgaria⁴*	2022	1.23
Hungary	2023	1.25
Israel	2023	1.29
Greece	2023	1.3
Australia⁴	2022	1.32
Slovak Republic	2023	1.33
Spain⁵	2024	1.34
Luxembourg	2023	1.4
Czechia	2023	1.48
Chile	2023	1.54
Poland⁴	2022	1.65
Mexico	2023	1.71

## Sheet: Table S2
Table S2. Data on the number of doctors and nurses employed in hospitals
Eurostat Database (accessed December 10th 2025)
https://ec.europa.eu/eurostat/data/database
Data extracted on 15/12/2025 12:50:52 from [ESTAT]
	practicing physicians - total number	practicing midwives - total number	practicing nurses (EU recognised qualifications) - total number	physicians - FTE, employed in hospitals	nurses and midwives - FTE, employed in hospitals	physicians - head count, employed in hospitals	nurses and midwives - head count, employed in hospitals	Share (%) physicians (head count) employed in hospitals to total number of practicing physicians	Share (%) midwives and nurses (head count) employed in hospitals to total number of practicing midwives and nurses
TIME	2023	2023	2023	2023	2023	2023	2023	2023	2023
GEO (Labels)
Belgium	39723	:	:	8747.3	62162.7	:	:	n/a	n/a
Bulgaria	29846	3253	28570	:	:	17764	20572	0.595189	0.646451
Czechia	45820	4572	86086	24714.8	53619.8	29162	59336	0.636447	0.654504
Denmark	26942	2667	62344	19439	36896	20810	42249	0.7724	0.649875
Germany	388343	28000	1020000	184000	414000	221000	559000	0.569085	0.533397
Estonia	4772	523	9103	2531.14	4866.29	3224	6299	0.675608	0.654374
Ireland	20135	4251	72543	11136.4	29744	11598	32907	0.576012	0.42851
Greece	:	2829	22796	:	:	25204	25625	n/a	1
Spain	212201	13833	284232	:	:	128608	192872	0.606067	0.64708
France	266380	25330	:	147418	358119	189995	386163	0.713248	n/a
Croatia	15480	1522	9704	:	:	9588	7797	0.61938	0.694548
Italy	315720	17659	404497	:	:	140952	286051	0.446446	0.677595
Cyprus	5119	337	4988	930	4346	930	4346	0.181676	0.81615
Latvia	6309	383	7828	:	:	3580	5639	0.567443	0.686762
Lithuania	13256	778	21455	9580	14389	8728	13533	0.658419	0.60869
Luxembourg	2668	:	:	:	:	:	:	n/a	n/a
Hungary	34743	2308	43237	13454.1	23370.2	16193	24339	0.466079	0.534395
Malta	2515	275	4126	1564.68	3029.78	1671	3552	0.664414	0.807089
Netherlands	69985	4615	198573	22710	61422	24312	78226	0.347389	0.384993
Austria	50356	2747	94034	24121.3	50806	27003	63498	0.536242	0.6561
Poland	141452	28527	216086	:	:	40243	143314	0.284499	0.585881
Portugal	:	:	:	:	:	25016	49759	n/a	n/a
Romania	70965	2861	19150	38670	14394.5	39140	14444	0.551539	0.656217
Slovenia	7430	411	10820	:	:	4267	6277	0.574293	0.558899
Slovakia	:	:	:	10680.8	21801.4	:	:	n/a	n/a
Finland	16102	2204	70722	:	:	9866	38341	0.612719	0.525752
Iceland	1735	289	3843	:	:	:	:	n/a	n/a
Liechtenstein	133	23	279	28.05	63.28	37	69	0.278195	0.228477
Norway	27455	2587	85943	14136	40890	14667	46734	0.53422	0.527889
Switzerland	40440	3138	106931	26406.1	51872.5	33098	69465	0.818447	0.631104
Montenegro	1764	250	744	:	:	972	733	0.55102	0.737425
Moldova	:	472	:	7159.25	:	5681	:	n/a	n/a
North Macedonia	:	:	:	:	:	:	:	n/a	n/a
Serbia	21776	1145	46371	12841.5	33385	12901	33389	0.592441	0.70269
Türkiye	:	:	:		:	168354	266282	n/a	n/a

## Sheet: Table S3
Table S3. Data collection form overview
Data	Country:
A – General context of health professionals’ employment regulations
· Is there a ban on medical professionals dual employment? (e.g. ban for physician working in both public and private health care providers; has it been ever proposed?).
· Are there any data on physicians and nurses double/multiple employment?
· Who is responsible for physicians and nurses recruitment in public hospitals (hospital managers – decentralized approach vs. regional/national government – e.g. centralized approach when physicians have civil servant status)?
· What are the main legal forms on health professionals employment (e.g. job agreement/salary vs. B2B/self-employed)?
· What is the dominant form of physicians and nurses employment in hospitals?
B – Wage setting process (for physicians and nurses employed in hospitals)
· Are there any major differences between health professionals wages regulation and employees in general economy (is there a regulation on minimum wage in general economy)?.
· Describe the process of physicians and nurses wage settings in hospitals.
What is the role of negotiations?
· What type of negotiations take place in relation to physicians and nurses (employed in hospitals) wages (collective vs individual)?
· How often and on what level these negotiations take place?
· What is the role of professional associations (of both employees - physicians/nurses as well as employers – hospital associations)?
· What data on the value of physicians and nurses’ (employed in hospital) earnings are available?
· What are there major differences in the level of earning (e.g., between physician and nurses; depending on type of employment)
· How were the wages increases in recent years funded? (if relevant for a given country)
C – Main Challenges
· What are the main challenges of the wage setting process?
· Are there some visible effects of wages increase (if applicable for your country) in terms of the overall health system performance (e.g. limited physician/nurses emigration?)
· What regulatory changes are currently being proposed/discussed?

## Sheet: Table S4
Table S4. The ratio of the physicians’ and nurses’ minimum (M) or basic (B) salary value to the average wage in the national economy (2024).
Country	Health professional category*	Salary type**	Ratio
Bulgaria	Physician without specialization	M	0.86
	Physician with one specialization	M	0.90
	Nurse	M	0.65
Croatia	Physician without specialization	B	1.51
	Physician with specialization	B	1.98
	Nurse (General Care / Secondary Education)	B	0.80
	Nurse with Specialization (Nurse Specialist in Emergency Medicine)	B	1.14
Czechia	Physician without any specialization and less than 1 year of working experience	B	0.90
	Physician with specialization (with the state licensing exam) and 10 years of working experience	B	1.23
	Nurse with secondary-school training who has completed a four-year accredited programme with less than 1 year of experience	B	0.53
	Nurse with a three-year bachelor’s degree in nursing or an equivalent three-year diploma programme and 10 years of experience	B	0.85
Estonia	Physician without specialization	M	1.67
	Physician with specialization	M	1.81
	Nurse without specialization	M	1.02
	Nurse with specialization	M	1.06
Hungary	Physician with lowest number (0-2) of years of working experience (qualifications are not included)	B	1.14
	Physician with highest number (41+) of years of working experience (qualifications are not included)	B	3.96
	Nurse with the lowest number of years of experience and lowers qualifications	B	0.51-0.78
	Nurse with the highest number of years of experience and highest qualifications	B	1.06-2.33
Lithuania	Physician	M	0.94
	Nurse	M	0.66
	Nurse with university degree	M	0.75
Poland	Physician without specialization	M	1.04
	Physician with specialization	M	1.27
	Nurse without specialization	M	0.89
	Nurse with specialization	M	1.13
Romania	Physician without specialization	B	1.07
	Physician with specialization	B	1.40
	Nurse without specialization	B	0.68
	Nurse with specialization	B	0.73
Slovakia	Physician without specialization and 10 years of working experience	M	1.41
	Physician with specialization and 10 years of working experience	M	2.40
	Nurse without specialization and 10 years of working experience	M	0.94
	Nurse with specialization and 10 years of working experience	M	1.07
Slovenia	Physician without specialization (with basic licence to practice)	B	1.03
	Physician with specialization (senior specialist)	B	1.81
	Nurse (higher education) working in specialist outpatient clinic	B	0.86
	Nurse (higher education) working in an ambulance with a completed emergency verification	B	1.03
*Depending on the country the specific health professional categories may vary in detailed descriptions and as well as the rules of minimum/basic wage calculation - e.g. inclusion of the years of experience factor. The latter is directly included in Czechia, Slovakia, and Hungary while in the remaining countries it may also impact the level of gross wage, yet is calculated separately (as an addit…
Source: Authors’ own calculations based on dedicated national regulations and national statistical office data on the average wage in general economy
